# Supplementary material
Source: PubMed Central journal article supplement (PMC2735364)
Supplement: fj.09-129304_1.pdf [file fj.09-129304_1.pdf]

Supplementary Figure 1

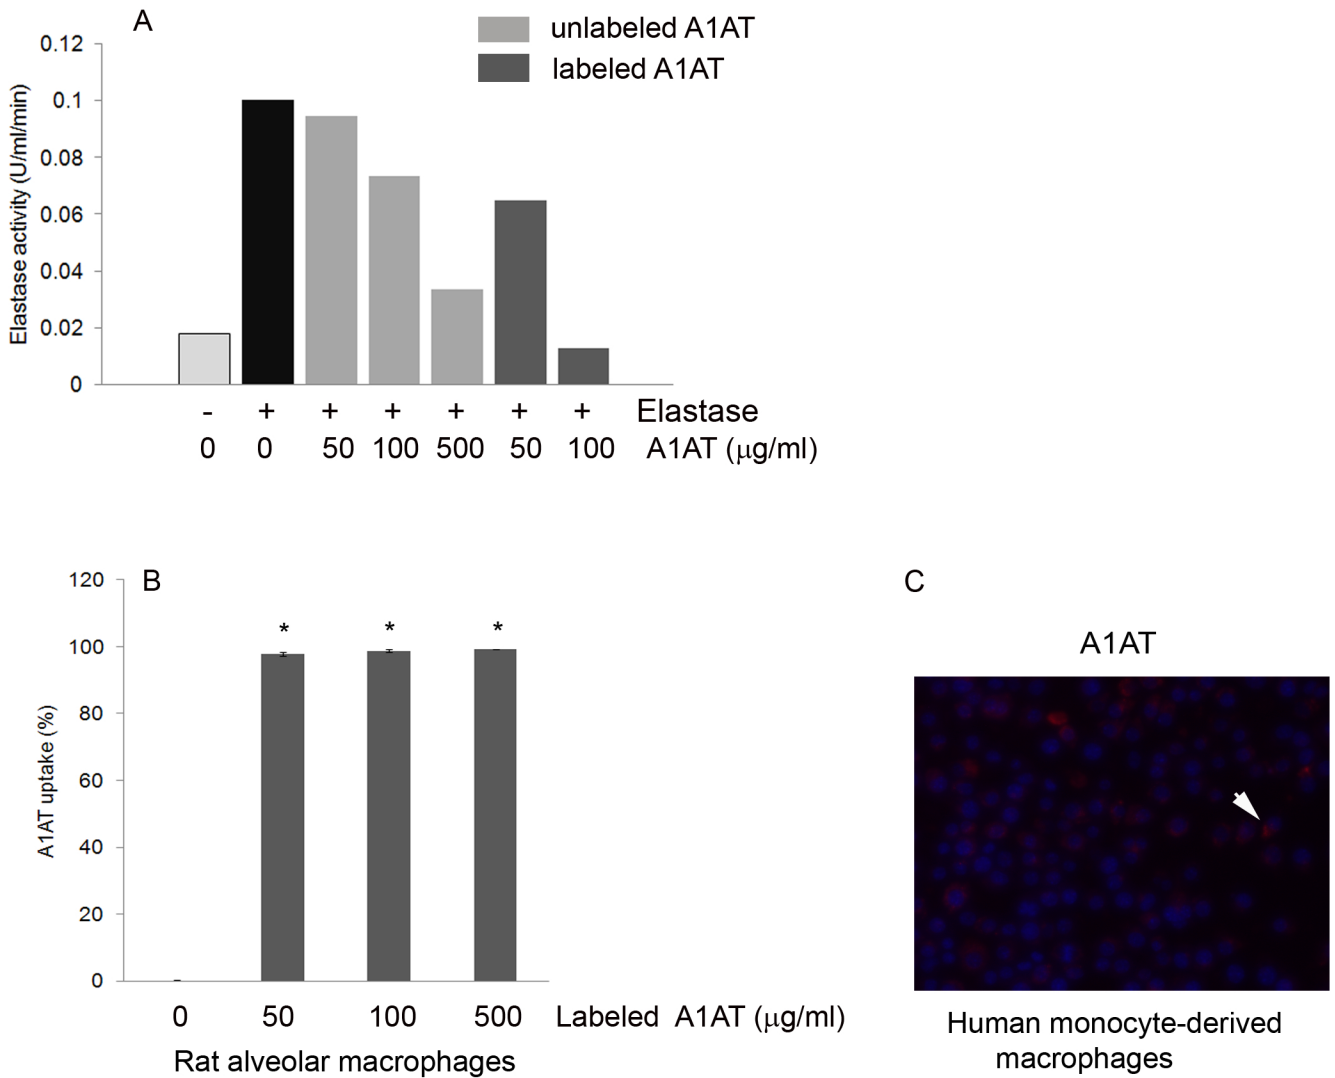

**Supplementary Figure 1. a.** Effect of A1AT labeling on the anti-elastase activity of A1AT. *In vitro* elastase activity (measured in units of elastase activity against the elastin substrate) in the absence or presence of indicated concentrations of unlabeled (light grey bars) and labeled (dark grey bars) of purified human A1AT. Note that the labeled A1AT retains potent anti-elastase activity. **b.** Quantification of Alexa Fluor 488-tagged A1AT (at the indicated concentrations) internalization by primary rat alveolar macrophages, measured by flow cytometry (mean (+SEM) percentage of cells which stained positive for A1AT; \* $p < 0.05$  vs. non-treated cells; ANOVA). **c.** Representative fluorescence microscopy micrographs of monocyte-derived macrophages treated with labeled-A1AT (red; arrow; 100 μg/ml; 4h).
